# Supplementary material for: Impact of Gut Microbiota and Diet on the Development of Atherosclerosis in Apoe−/− Mice
Source: PubMed Central journal article supplement — Arterioscler Thromb Vasc Biol. 2018 Jun 14;38(10):2318–26. doi: 10.1161/ATVBAHA.118.311233 (PMC6166703; doi:10.1161/atvbaha.118.311233), 2018-06-14
Supplement: atv-38-2318-s001.pdf [file atv-38-2318-s001.pdf]

## **SUPPLEMENTAL MATERIAL**

### **The impact of gut microbiota and diet on the development of atherosclerosis in *Apoe*<sup>-/-</sup> mice**

Annika Lindskog Jonsson, Robert Caesar, Rozita Akrami, Christoph Reinhardt, Frida Fåk Hållenius, Jan Borén, Fredrik Bäckhed

# Supplemental Figures and Figure Legends

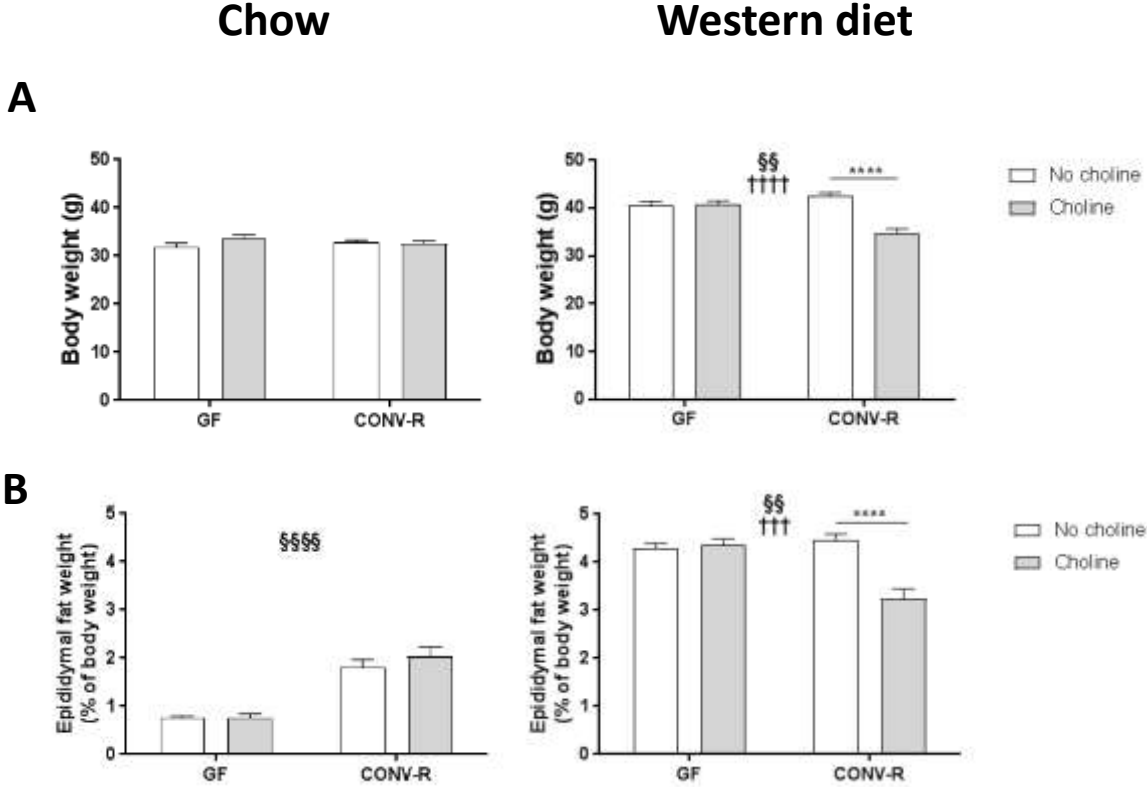

**Supplemental Figure I. Physiological parameters in male *Apoe*<sup>-/-</sup> mice are dependent on microbiota and diet.** Body weight (A) and epididymal fat weight (B) in GF (n=15-19) and CONV-R (n=18-20) *Apoe*<sup>-/-</sup> mice fed chow (left panels) or Western diet (right panels) with or without supplementation of choline for 12 weeks. Data are presented as mean ± SEM. Variation induced by the gut microbiota: \$p<0.05, \$\$p<0.01, \$\$\$p<0.0001. Variation induced by choline: ††p<0.001, †††p<0.0001. Post hoc multiple comparison analysis: \*\*\*\*p<0.0001.

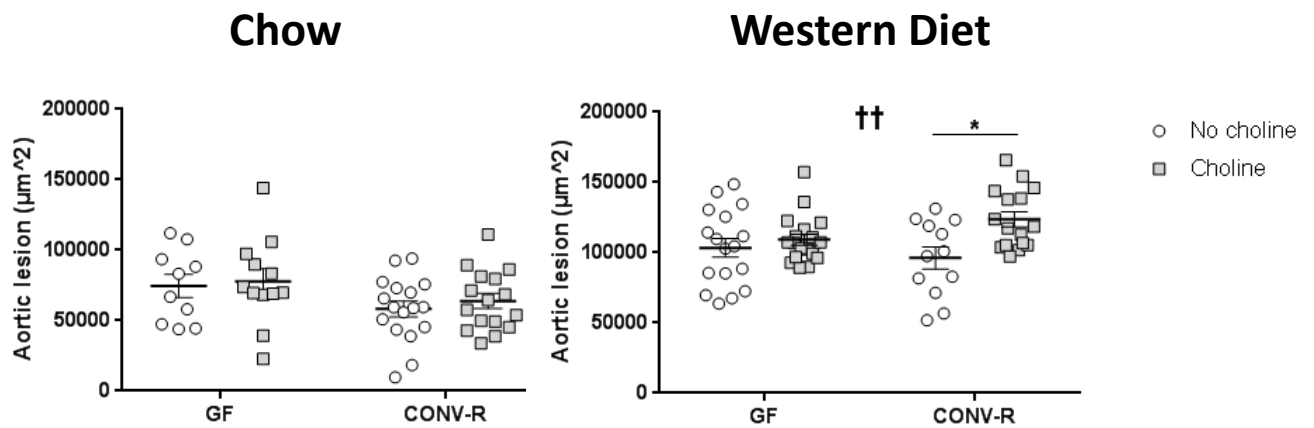

**Supplemental Figure II. Development of atherosclerosis is dependent on microbiota and diet.** The lesion area in aortic root sections from chow-fed (left panel) and Western diet-fed (right panel) mice. Data are presented as mean  $\pm$  SEM. Variation induced by the gut microbiota: § $p < 0.05$ . Variation induced by choline: †† $p < 0.01$ . Post hoc multiple comparison analysis: \* $p < 0.05$ .

## Chow

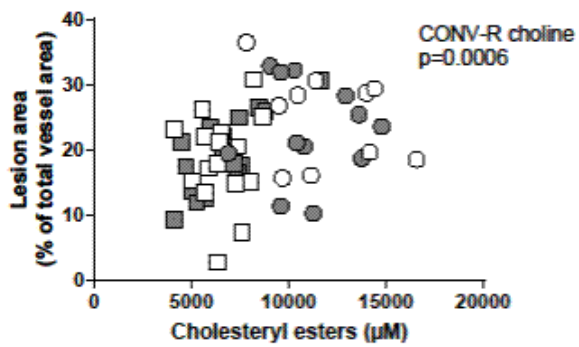

## Western Diet

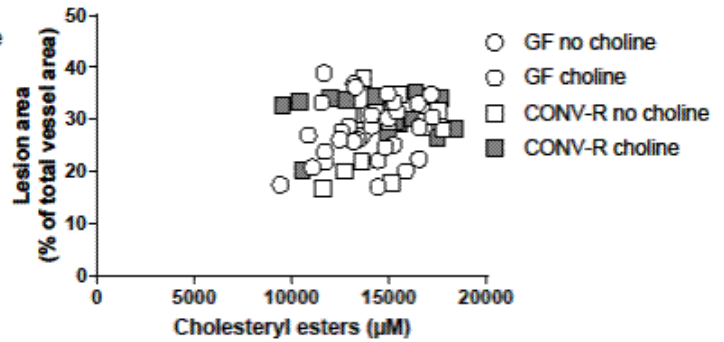

**Supplemental Figure III. Correlation between atherosclerosis lesion area and cholesteryl esters.** The lesion area in aortic root sections from chow-fed (left panel) and Western diet-fed (right panel) mice plotted against plasma levels of cholesteryl esters.

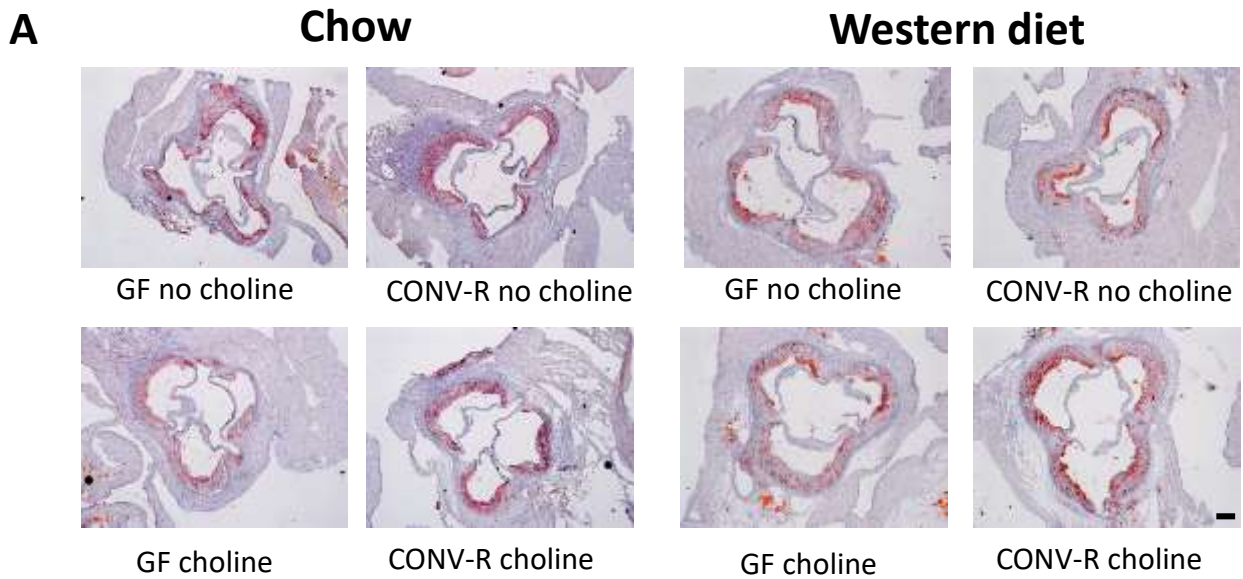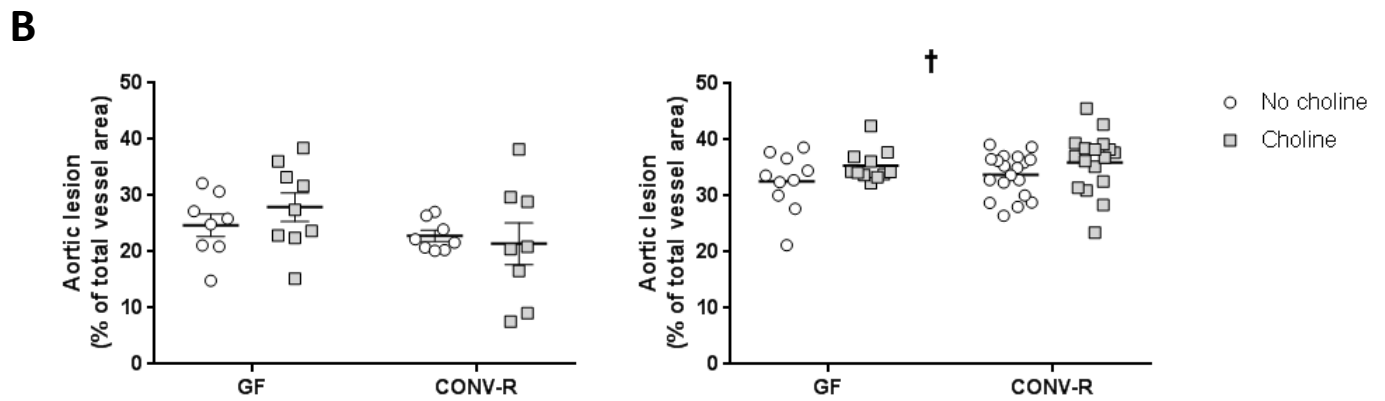

**Supplementary Figure IV. Atherosclerotic lesion size in female *Apoe*<sup>-/-</sup> mice.** Female GF and CONV-R mice were fed chow (n = 8-9, left panel) or Western diet (n = 10-19, right panel) with or without supplementation of choline for 12 weeks. Presented are representative Oil-red-O-stained aortic root lesions (A) and lesion size normalized to vessel area (B). Data are presented as mean ± SEM. Variation induced by choline: †p<0.05. Scale bar = 20µm.

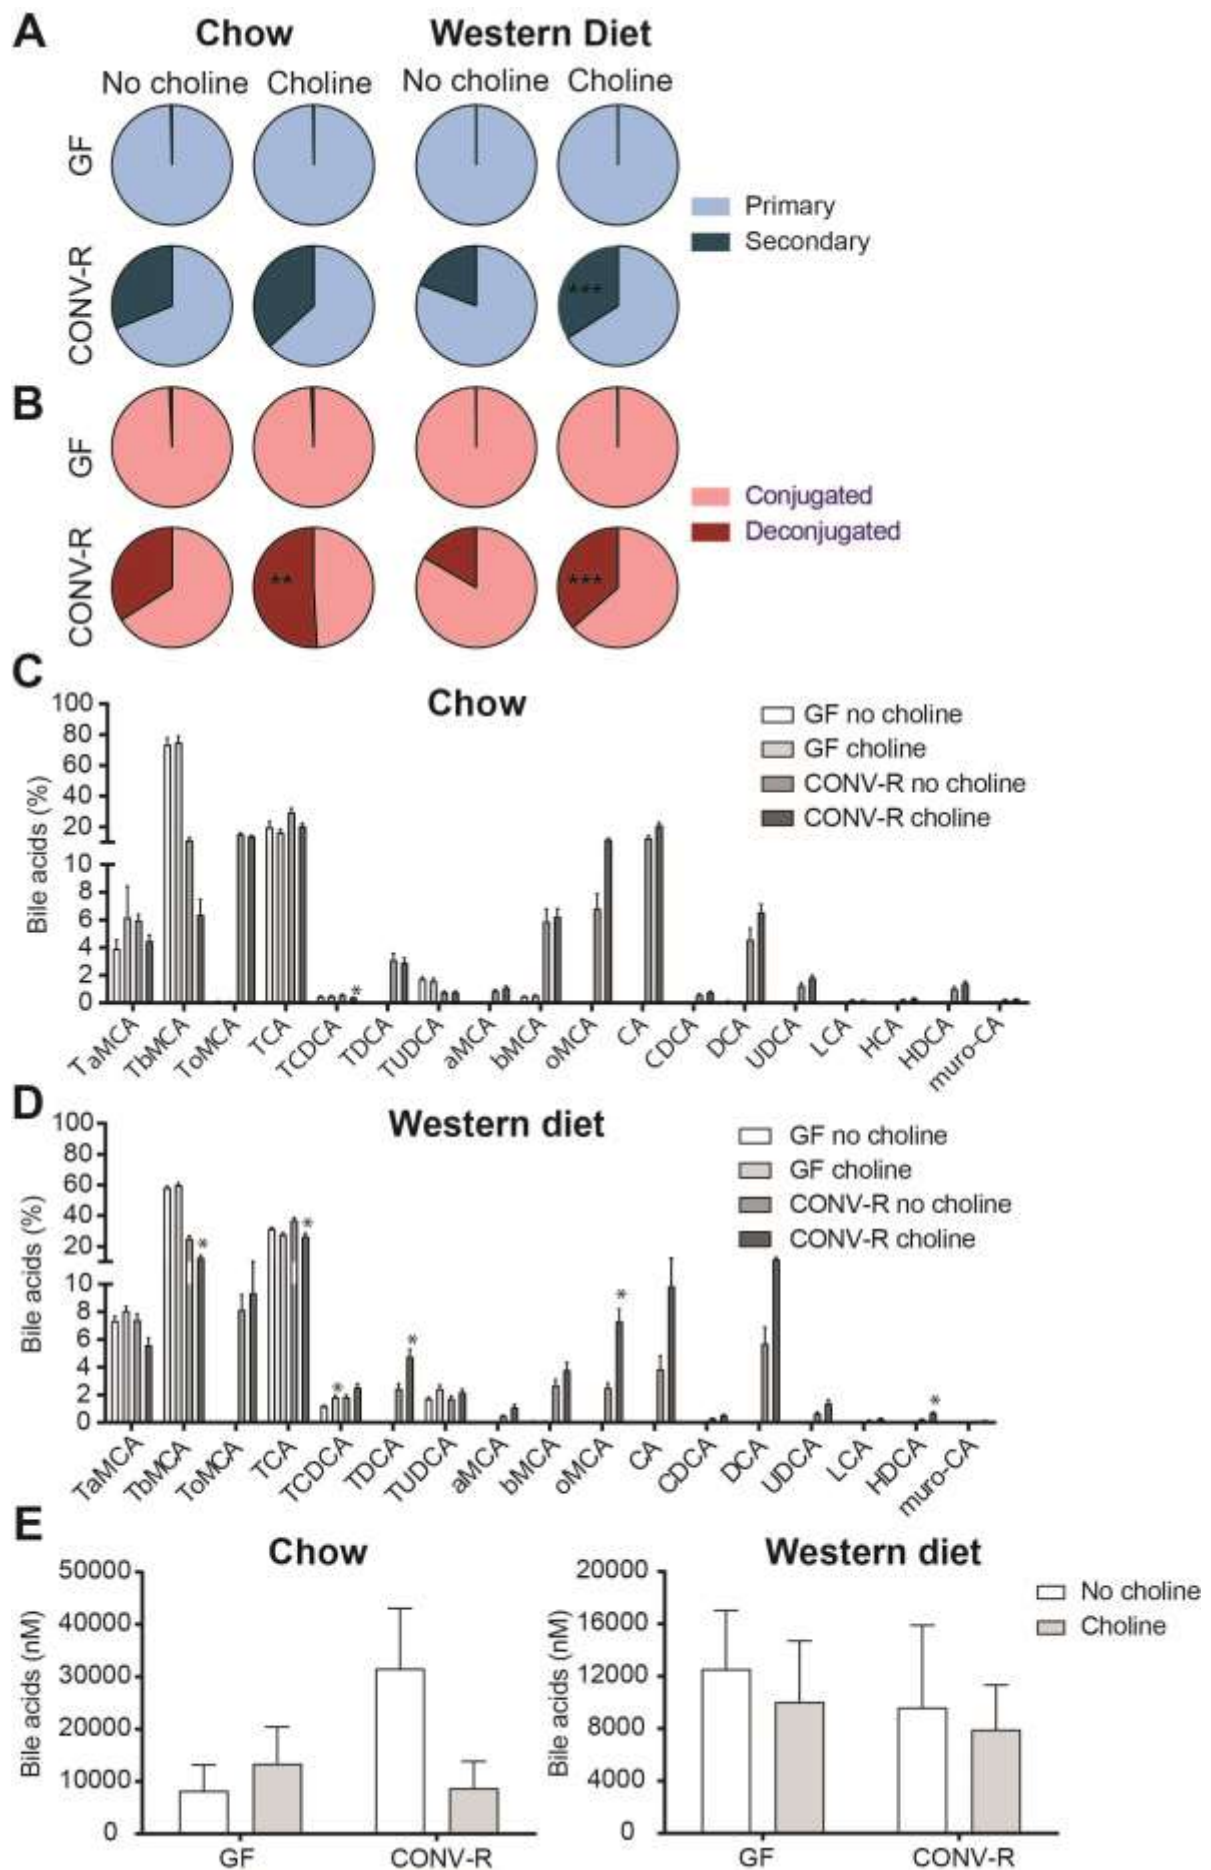

**Supplemental Figure V. Microbial status and diet determines bile acid composition.** Pie charts showing the distribution of primary and secondary (A) or conjugated and deconjugated (B) bile acids in GF and CONV-R mice fed chow (n=10-18, left panel) or Western diet (n=15-20, right panel). Individual bile acid composition in chow (C) and Western diet (D)- fed mice. Total bile acid concentration in plasma (E). Data are presented as mean relative proportion of bile acid composition  $\pm$  SEM. In (A) and (B) \*\*p<0.01, \*\*\*p<0.001 indicate difference versus CONV-R with no choline supplementation determined by Mann-Whitney test. In (C) and (D) \*p<0.05 indicate difference versus no choline determined by PERMANOVA. GF, germ-free; CONV-R, conventionally raised; CA, cholic acid; LCA, lithocholic acid; UDCA, ursodeoxycholic acid; CDCA, chenodeoxycholic acid; DCA, deoxycholic acid; MCA, muricholic acid; T, taurine-conjugated species.

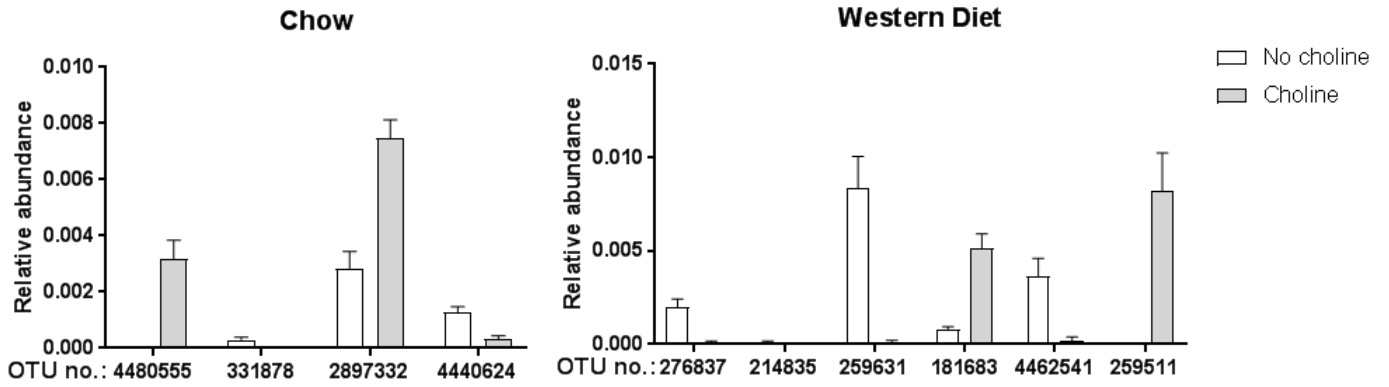

**Supplemental Figure VI. Relative abundance of operational taxonomic units (OTUs).**

Analysis of taxa using the pipeline in QIIME revealed that the relative abundance of four (chow, n=17-18) and six (Western diet, n=13-16) OTUs belonging to the order *Clostridiales* were differentially abundant in cecal content from *Apoe*<sup>-/-</sup> mice that were fed a choline-free or choline-supplemented diet.



**Supplemental Table I. Cytokine concentrations in plasma from *Apoe*<sup>-/-</sup> mice.**

| Cytokine                       | Chow             |                  |                  |                  | <i>p</i> | Western diet     |                  |                  |                  | <i>p</i> |
|--------------------------------|------------------|------------------|------------------|------------------|----------|------------------|------------------|------------------|------------------|----------|
|                                | GF               |                  | CONV-R           |                  |          | GF               |                  | CONV-R           |                  |          |
|                                | No choline       | Choline          | No choline       | Choline          |          | No choline       | Choline          | No choline       | Choline          |          |
| <b>IFN-<math>\gamma</math></b> | 0.440 $\pm$ 0.04 | 0.437 $\pm$ 0.11 | 0.408 $\pm$ 0.06 | 0.426 $\pm$ 0.07 | ns       | 0.377 $\pm$ 0.03 | 0.425 $\pm$ 0.03 | 0.483 $\pm$ 0.05 | 0.490 $\pm$ 0.05 | §        |
| <b>IL-1<math>\beta</math></b>  | 0.183 $\pm$ 0.02 | 0.161 $\pm$ 0.03 | 0.622 $\pm$ 0.12 | 0.797 $\pm$ 0.28 | §§§§     | 0.162 $\pm$ 0.01 | 0.171 $\pm$ 0.02 | 0.291 $\pm$ 0.04 | 0.347 $\pm$ 0.05 | §§§      |
| <b>IL-2</b>                    | 1.025 $\pm$ 0.11 | 0.850 $\pm$ 0.13 | 1.215 $\pm$ 0.11 | 1.046 $\pm$ 0.21 | ns       | 1.116 $\pm$ 0.07 | 1.087 $\pm$ 0.08 | 1.256 $\pm$ 0.10 | 1.081 $\pm$ 0.11 | ns       |
| <b>IL-4</b>                    | 0.046 $\pm$ 0.02 | 0.063 $\pm$ 0.04 | 0.029 $\pm$ 0.01 | 0.051 $\pm$ 0.02 | ns       | 0.160 $\pm$ 0.03 | 0.095 $\pm$ 0.02 | 0.151 $\pm$ 0.04 | 0.115 $\pm$ 0.04 | ns       |
| <b>IL-5</b>                    | 5.236 $\pm$ 0.85 | 4.953 $\pm$ 0.56 | 3.365 $\pm$ 0.32 | 4.003 $\pm$ 0.66 | §        | 6.232 $\pm$ 0.48 | 6.276 $\pm$ 0.64 | 4.017 $\pm$ 1.27 | 4.569 $\pm$ 0.48 | ns       |
| <b>IL-12p70</b>                | 0.978 $\pm$ 0.54 | 3.626 $\pm$ 3.44 | 0.845 $\pm$ 0.57 | 2.106 $\pm$ 1.12 | ns       | 1.319 $\pm$ 0.92 | 1.872 $\pm$ 0.74 | 6.734 $\pm$ 2.06 | 7.085 $\pm$ 1.48 | §§§      |

All concentrations are in pg/mL and shown in mean  $\pm$  SEM. For samples where values were below detection range the cytokine concentration was put to 0.

Differences are determined by 2-way ANOVA with Tukey post hoc multiple comparison. Chow n = 11-12, Western diet n = 12-19.

GF, germ-free; CONV-R, conventionally raised, IFN, interferon; IL, interleukin.

Variation induced by the gut microbiota: §*p*<0.05, §§*p*<0.01, §§§*p*<0.001, §§§§*p*<0.0001.

**Supplemental Table II. Proportion of OTUs significantly correlated with plasma TMAO and bile acids.**

| Diet         | OTU no. | Taxa                          | Choline     |             | TMAO   |         | TCDCA  |       | TbMCA  |        | TCA    |       | ωMCA   |       | TDCA   |       | HDCA   |       |
|--------------|---------|-------------------------------|-------------|-------------|--------|---------|--------|-------|--------|--------|--------|-------|--------|-------|--------|-------|--------|-------|
|              |         |                               | No choline  | Choline     | r      | p       | r      | p     | r      | p      | r      | p     | r      | p     | r      | p     | r      | p     |
| Chow         | 4480555 | o_Clostridiales; f_<br>g_; s_ | 0.001±0.001 | 0.319±0.065 | 0.512  | 0.002   | -0.423 | 0.011 |        |        |        |       |        |       |        |       |        |       |
|              | 331878  | f_Lachnospiracea<br>e; g_; s_ | 0.030±0.009 | 0.003±0.001 | -0.410 | 0.014   | 0.003  | 0.98  |        |        |        |       |        |       |        |       |        |       |
|              | 2897332 | g_Ruminococcus;<br>s_gnavus   | 0.281±0.064 | 0.748±0.065 | 0.626  | <0.0001 | -0.295 | 0.086 |        |        |        |       |        |       |        |       |        |       |
|              | 4440624 | f_Lachnospiracea<br>e; g_; s_ | 0.128±0.019 | 0.033±0.011 | -0.621 | <0.0001 | 0.256  | 0.14  |        |        |        |       |        |       |        |       |        |       |
| Western diet | 276837  | o_Clostridiales; f_<br>g_; s_ | 0.199±0.045 | 0.009±0.008 | -0.600 | 0.0006  |        |       | 0.638  | 0.0002 | 0.443  | 0.016 | -0.489 | 0.007 | -0.474 | 0.009 | -0.565 | 0.001 |
|              | 214835  | f_Lachnospiracea<br>e; g_; s_ | 0.015±0.004 | 0.000±0.000 | -0.573 | 0.001   |        |       | 0.293  | 0.12   | 0.256  | 0.18  | -0.379 | 0.043 | -0.141 | 0.47  | -0.348 | 0.064 |
|              | 259631  | g_Ruminococcus;<br>s_gnavus   | 0.834±0.171 | 0.011±0.009 | -0.617 | 0.0004  |        |       | 0.459  | 0.012  | 0.354  | 0.060 | -0.456 | 0.013 | -0.275 | 0.15  | -0.441 | 0.017 |
|              | 181683  | o_Clostridiales; f_<br>g_; s_ | 0.079±0.016 | 0.514±0.077 | 0.385  | 0.039   |        |       | -0.261 | 0.17   | -0.311 | 0.10  | 0.284  | 0.14  | 0.282  | 0.14  | 0.305  | 0.11  |
|              | 4462541 | o_Clostridiales; f_<br>g_; s_ | 0.366±0.095 | 0.021±0.019 | -0.561 | 0.002   |        |       | 0.569  | 0.0013 | 0.400  | 0.032 | -0.441 | 0.017 | -0.399 | 0.032 | -0.517 | 0.004 |
|              | 259511  | o_Clostridiales; f_<br>g_; s_ | 0.000±0.000 | 0.822±0.202 | 0.586  | 0.0008  |        |       | -0.446 | 0.015  | -0.369 | 0.049 | 0.439  | 0.017 | 0.097  | 0.62  | 0.503  | 0.006 |

Pearson's correlation was used to calculate the correlation coefficient *r* and *p*-values of the proportion of OTUs and TMAO or bile acids regulated by choline in chow and Western diet-fed mice.

OTU, operational taxonomic unit; TMAO, trimethylamine-*N*-oxide; TCDCA, taurochenodeoxycholic acid; TbMCA, tauro-beta-muricholic acid; TCA, taurocholic acid; ωMCA, omega-muricholic acid; TDCA, taurodeoxycholic acid; HDCA, hyodeoxycholic acid.

Different taxonomic levels: o, order; f, family; g, genus; s, species.
