# Supplementary figures and images for: Impact of Gut Microbiota and Diet on the Development of Atherosclerosis in Apoe−/− Mice
Source: PubMed Central journal article supplement — Arterioscler Thromb Vasc Biol. 2018 Jun 14;38(10):2318–26. doi: 10.1161/ATVBAHA.118.311233 (PMC6166703; doi:10.1161/atvbaha.118.311233), 2018-06-14

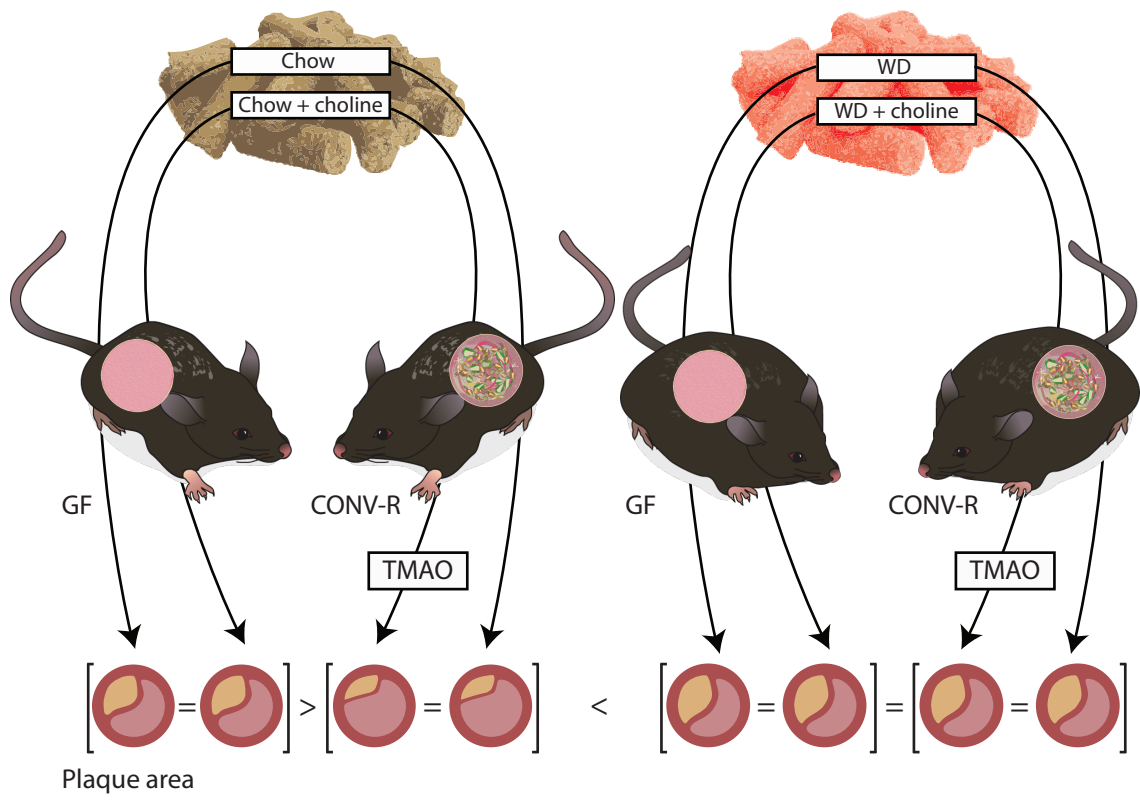

Supplement: atv-38-2318-s002.pdf [file atv-38-2318-s002.pdf]
